# Supplementary material for: Shape-controlled movement of Zn/SU-8 micromotors
Source: Royal Society of Chemistry journal article supplement (doi:10.1039/d4na00721b), 2024-01-01
Supplement: d4na00721b2.pdf [file d4na00721b2.pdf]

# Supporting Information

## **Shape-controlled movement of Zn/SU-8 micromotors**

Tijana Maric<sup>ab\*</sup>, Lasse Højlund Eklund Thamdrup<sup>ab</sup>, Anja Boisen<sup>ab</sup>

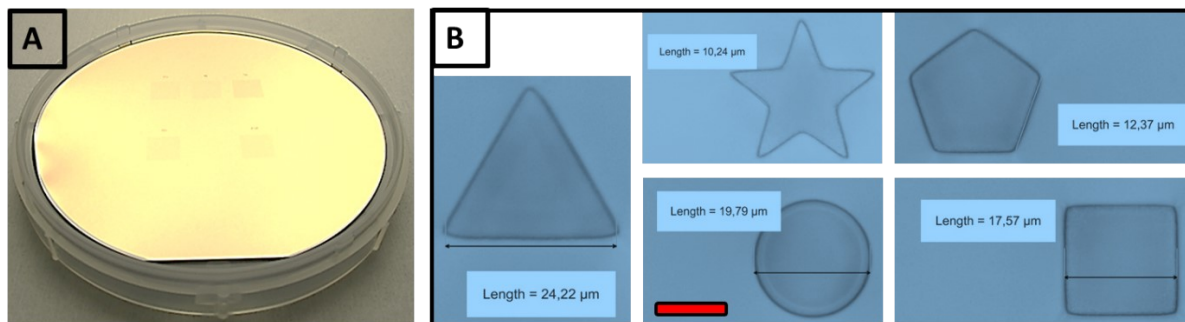

**Figure S1.** A) One substrate with 5 fields contain cylindrical, square, triangular, pentagon and star shape MMs. B) Optical microscopy images of all 5 fields. Scale bar: 10 μm.

**Table S1.** Summarized data for the diameter or side length of Zn/Su-8 MMs calculated from the data collected by optical microscope.

|                | Diameter or side length [ $\mu\text{m}$ ] |                           |                         |                         |                           |
|----------------|-------------------------------------------|---------------------------|-------------------------|-------------------------|---------------------------|
|                | <b>Cylindrical</b>                        | <b>Rectangular cuboid</b> | <b>Triangular prism</b> | <b>Pentagonal prism</b> | <b>Pentagrammic prism</b> |
| Sharp 1 Ti Au  | 19.5                                      | 18.0                      | 25.0                    | 9.7                     | 12.5                      |
| Sharp 2 Ti Au  | 19.5                                      | 17.9                      | 24.7                    | 9.9                     | 12.7                      |
| Sharp 3 Ti Au  | 19.4                                      | 17.6                      | 24.2                    | 10.1                    | 13.0                      |
| <b>AVERAGE</b> | <b>19.5</b>                               | <b>17.8</b>               | <b>24.6</b>             | <b>9.9</b>              | <b>12.7</b>               |

**Table S2.** Summarized vertical scanning interferometry (VSI) data for the height of the Zn/Su-8 MMs.

|                | Height[ $\mu\text{m}$ ] |                    |                  |                  |                    |
|----------------|-------------------------|--------------------|------------------|------------------|--------------------|
|                | Cylindrical             | Rectangular cuboid | Triangular prism | Pentagonal prism | Pentagrammic prism |
| Sharp 1 Ti Au  | 18.5                    | 18.2               | 18.6             | 19.0             | 19.0               |
| Sharp 2 Ti Au  | 18.1                    | 18.3               | 18.3             | 18.8             | 18.7               |
| Sharp 3 Ti Au  | 18.3                    | 18.0               | 18.2             | 18.8             | 18.7               |
| <b>AVERAGE</b> | <b>18.3</b>             | <b>18.2</b>        | <b>18.4</b>      | <b>18.9</b>      | <b>18.8</b>        |

**Table S3.** Preparation steps for Zn/Su-8 MMs fabrication.

| Description               | Equipment                                                                                                     | Parameters                         |
|---------------------------|---------------------------------------------------------------------------------------------------------------|------------------------------------|
| WAFER PREPARATION         |                                                                                                               |                                    |
| Anti-Adhesion layer       | Temescal                                                                                                      | Ti 5 nm (5 Å/s), Au 20 nm (10 Å/s) |
| SU-8 FIRST LAYER SPINNING |                                                                                                               |                                    |
| SU-8 spin-coating         | Spin Coater: LabSpin 03                                                                                       | 500rpm, 15s, 200rpm/s              |
| SU-8 soft-bake            | Hotplate1                                                                                                     | 1.5h, 50°C                         |
| SU-8 FIRST LAYER EXPOSURE |                                                                                                               |                                    |
| SU-8 exposure             | Aligner: Maskless 01                                                                                          | D=175 mJ/cm <sup>2</sup>           |
| Post-exposure bake        | Hotplate1                                                                                                     | 6h, 50°C                           |
| OM inspection             | Nikon ECLIPSE L200                                                                                            |                                    |
| SU-8 DEVELOPMENT          |                                                                                                               |                                    |
| SU-8 development          | mr-Dev 600                                                                                                    | 4min                               |
| Rinse                     | Developer SU-8                                                                                                | Isopropanol, Air                   |
| Characterization          | Nikon ECLIPSE L200<br>PLu Neox 3D Optical Profiler                                                            |                                    |
| Dicing                    |                                                                                                               |                                    |
| Dicing                    | Dicing saw                                                                                                    | Pitch 12.8 mm, 10 mm/s             |
| Interface metal stack     |                                                                                                               |                                    |
| Interface metal stack     | Electron-beam evaporator                                                                                      | Ti 5 nm, Au 20 nm                  |
| DEPOSITION                |                                                                                                               |                                    |
| Zn deposition             | Thermal evaporator equipped with an Al <sub>2</sub> O <sub>3</sub> crucible and a quartz crystal microbalance | 0.5 Å/s, 1-3×10 <sup>-6</sup> Torr |
